# Supplementary material for: Analysis of trace elements in uranium by inductively coupled plasma-optical emission spectroscopy, design of experiments, and partial least squares regression
Source: Royal Society of Chemistry journal article supplement (doi:10.1039/d3ja00013c), 2023-01-01
Supplement: d3ja00013c1.pdf [file d3ja00013c1.pdf]

## Supporting Information

### **Analysis of trace elements in uranium by inductively coupled plasma optical emission spectroscopy, design of experiments, and partial least squares regression**

*Luke R. Sadergaski,\* Benjamin T. Manard, and Hunter B. Andrews,*

Oak Ridge National Laboratory, 1 Bethel Valley Rd., Oak Ridge, TN, 37980, USA

\*Corresponding author: [sadergaskilr@ornl.gov](mailto:sadergaskilr@ornl.gov)

#### **This Supporting Information contains:**

Pages: 4

Figures: 2

Tables: 4

**Table S1.** Elements in one trace 100  $\mu\text{g mL}^{-1}$  standard.

|    |    |    |    |    |
|----|----|----|----|----|
| Al | Cr | Fe | K  | Tl |
| As | Co | La | Pr | Th |
| Ba | Cu | Pb | Re | Tm |
| Be | Dy | Li | Rb | U  |
| Bi | Er | Lu | Sm | V  |
| B  | Eu | Mg | Sc | Yb |
| Cd | Gd | Mn | Se | Y  |
| Ca | Ga | Nd | Na | Zn |
| Ce | Ho | Ni | Sr |    |
| Cs | In | P  | Tb |    |

**Table S2.** Elements in the second trace 100  $\mu\text{g mL}^{-1}$  standard.

|    |    |
|----|----|
| Sb | Ti |
| Ge | W  |
| Hf | Zr |
| Mo |    |
| Nb |    |
| Si |    |
| Ag |    |
| Ta |    |
| Te |    |
| Sn |    |

**Table S3.** Additional samples included in the validation set (*i.e.*, quality controls).

| Sample | Uranium ( $\mu\text{g mL}^{-1}$ ) | Trace ( $\mu\text{g mL}^{-1}$ ) | ( $\mu\text{g/g}$ ) |
|--------|-----------------------------------|---------------------------------|---------------------|
| 1      | 1000                              | 0.02                            | 20                  |
| 2      | 1000                              | 0.05                            | 50                  |
| 3      | 1000                              | 0.1                             | 100                 |
| 4      | 1000                              | 0.25                            | 250                 |
| 5      | 1000                              | 0.5                             | 500                 |
| 6      | 1000                              | 1.5                             | 1500                |

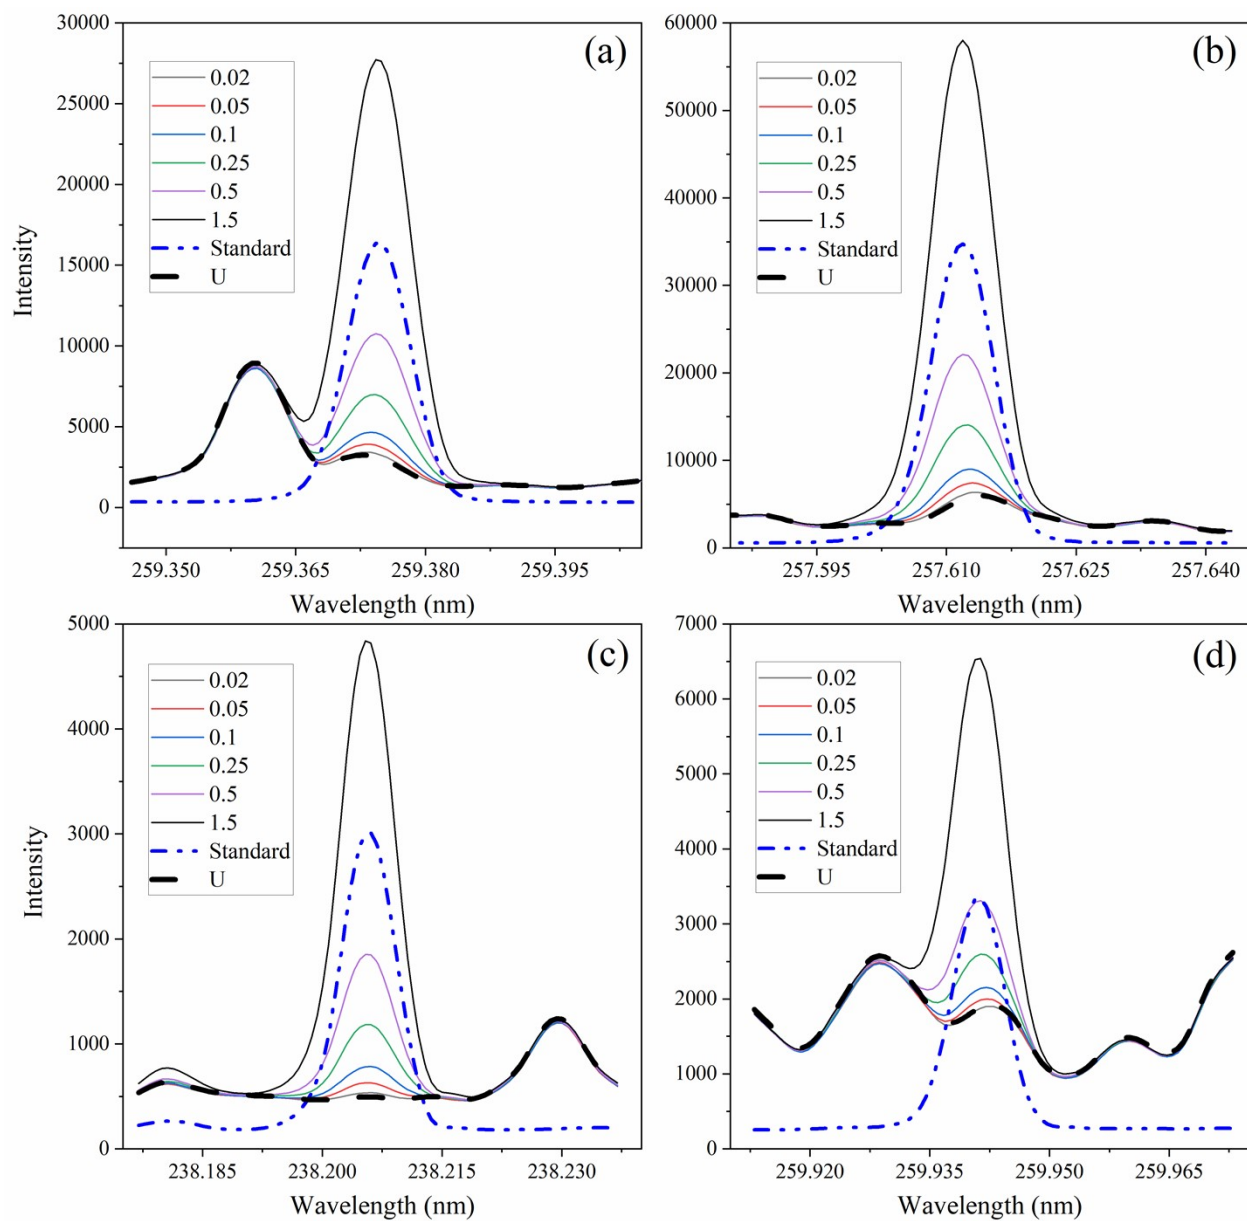

**Figure S1.** Optical emission spectra of trace elements from 0.02 to 1.5  $\mu\text{g mL}^{-1}$  in 1000  $\mu\text{g mL}^{-1}$  U for (a) Mn 259.37 nm, (b) Mn 257.61 nm, (c) Fe 238.20 nm, and (d) Fe 259.94 nm. Compared to a standard (1  $\mu\text{g mL}^{-1}$  multielement) and a 1000  $\mu\text{g mL}^{-1}$  U sample.

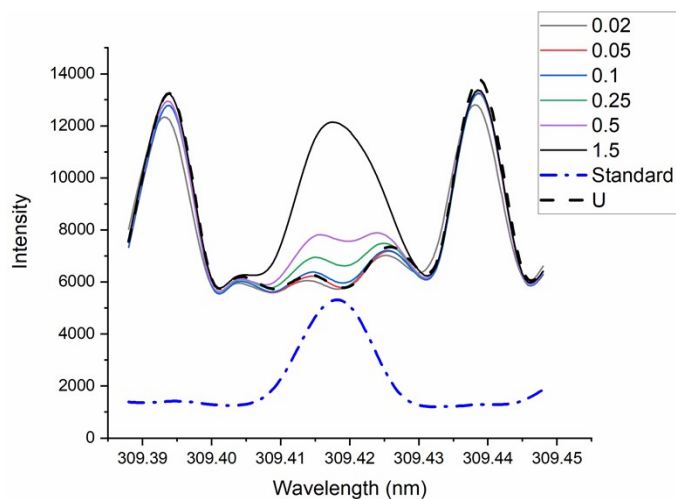

**Figure S2.** Optical emission spectra of Nb 309.42 nm 0.02 to 1.5  $\mu\text{g mL}^{-1}$  in 1000  $\mu\text{g mL}^{-1}$  U. Compared to a standard (1  $\mu\text{g mL}^{-1}$  multielement) and a 1000  $\mu\text{g mL}^{-1}$  U sample.

**Table S4.** Quality control samples to determine RMSE.

| Sample | Trace ( $\mu\text{g mL}^{-1}$ ) | U ( $\mu\text{g mL}^{-1}$ ) | $\mu\text{g trace/g U}$ |
|--------|---------------------------------|-----------------------------|-------------------------|
| 1      | 1.164                           | 528.3                       | 2208                    |
| 2      | 1.454                           | 762.4                       | 1911                    |
| 3      | 0.543                           | 107.9                       | 5055                    |
| 4      | 0.776                           | 344.5                       | 2258                    |
| 5      | 0.020                           | 963.9                       | 20                      |
| 6      | 0.052                           | 962.8                       | 54                      |
| 7      | 0.099                           | 966.0                       | 102                     |
| 8      | 0.241                           | 965.3                       | 250                     |
| 9      | 0.482                           | 967.3                       | 498                     |
| 10     | 1.569                           | 975.6                       | 1608                    |
